# Supplementary material for: A dual functional collagen scaffold coordinates angiogenesis and inflammation for diabetic wound healing
Source: Royal Society of Chemistry journal article supplement (doi:10.1039/d0bm00999g), 2020-01-01
Supplement: d0bm00999g1.pdf [file d0bm00999g1.pdf]

## Supplementary Figures

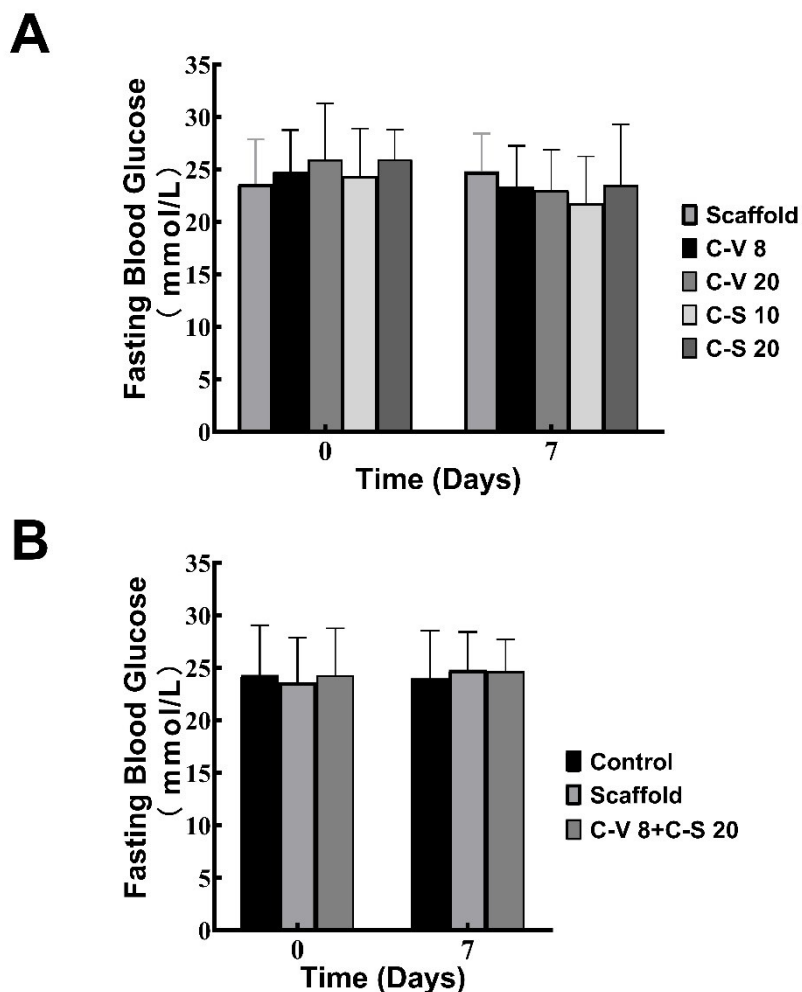

**Fig. S1.** Preoperative fasting blood glucose of diabetic rats in each group.

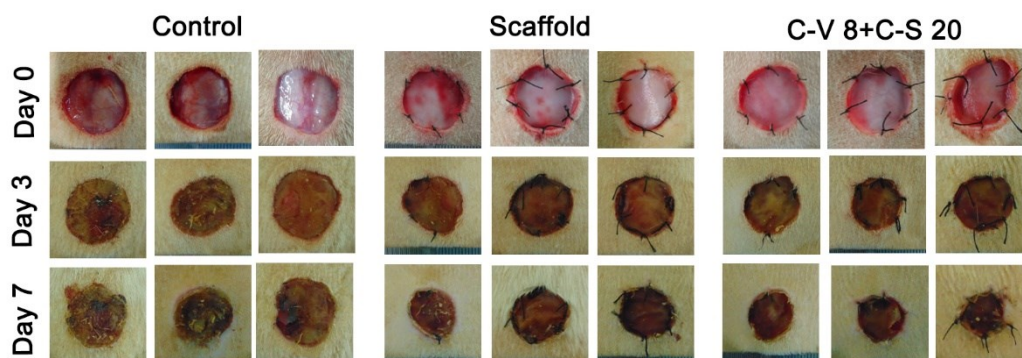

**Fig. S2.** Representative images showed that no difference of blood exudation from traumatic site of rats in Control, collagen scaffold and Co-modified collagen scaffold groups was observed at days 0, 3 and 7 post injury.
